# Supplementary material for: Creating a scientific solution: local problem solving in the Portuguese Health Examination Survey: a mixed method study
Source: Research Square preprint supplement (doi:10.21203/rs.3.rs-574316/v1), 2021-06-09
Supplement: Supplementary file 2 [file af73c25f9a777662aa8de44d.docx]

## Additional file 3: supplementary materials

The following materials were also consulted, but as they did not directly represent the local health survey teams and their opinions, they were not coded.

- Copies of the INSEF newsletter7s (N1 –N6)
- The confidential site visit report from November 2015 by Hanna Tolonen and Päivikki Koponen from the Finnish Institute for Health and Welfare (THL)
- Assorted documentation from meetings between INSA and NIPH
- Fieldwork barometer (weekly newsletter sent to all the local teams) from weeks 16 and 32 (April and October, 2015)
- The article Fieldwork Monitoring Strategies in a Health Examination Survey [2] (corroborating some of the findings from the other materials, particularly regarding the way the local teams expanded opening hours to allow more invitees to participate in the health survey, and regarding the support the central team gave the local teams)
- Regional training reports
